# Supplementary material for: Knockdown of Quinolinate Phosphoribosyltransferase Results in Decreased Salicylic Acid-Mediated Pathogen Resistance in Arabidopsis thaliana
Source: MDPI journal article supplement (doi:10.3390/ijms22168484), 2021-08-06
Supplement: s1 [file s1]

**Table S1. List of primers used in the study.**

| Name         | Sequence (5'-3')                                          | Technique         |
|--------------|-----------------------------------------------------------|-------------------|
| RiQPRT-Fwd1  | <u>TCATTTGGAGAGGACACGCTCGAGGCCTCCT</u><br>TCACACCCTACTTAC | pHY6 construction |
| RiQPRT-Rev1  | <u>AGCTGGGGTACCGAATTCCTCGAGTGCAATT</u><br>CCTCATCCTCTG    | pHY6 construction |
| RiQPRT-Fwd2  | <u>ACTCATTAAAGCAGGACTCTAGAGCCTCCTTC</u><br>ACACCCTACTTAC  | pHY6 construction |
| RiQPRT-Rev2  | <u>ATCGATAAGCTTGGATCCTCTAGATGCAATTC</u><br>CACTCATCCTCTG  | pHY6 construction |
| q-QPRT-Fwd   | TTGTCGCCTCAATTCTACGCAAT                                   | qRT-PCR           |
| q-QPR-Rev    | ACATCTCCTGTATGACCAGCATCT                                  | qRT-PCR           |
| q-AOX1-Fwd   | ACATCTGCTTGGATATGGACTA                                    | qRT-PCR           |
| q-AOX1-Rev   | TCGTGCGAGCTCTAGTCCAT                                      | qRT-PCR           |
| q-FER1-Fwd   | AACGCACTCTCGTCTTTCAC                                      | qRT-PCR           |
| q-FER1-Rev   | ATCGGCTTTCTTCACCTCTT                                      | qRT-PCR           |
| q-GSTU24-Fwd | GGCGAGTATGTTTGGGATG                                       | qRT-PCR           |
| q-GSTU24-Rev | TTCATCTCGAGGAGCAAGG                                       | qRT-PCR           |
| q-OXI1-Fwd   | GTTGAGGAAATCAAGGGTCATG                                    | qRT-PCR           |
| q-OXI1-Rev   | TGGACGATATTCTCCACATCC                                     | qRT-PCR           |
| q-ICS1-Fwd   | TTGGTGGCGAGGAGAGTG                                        | qRT-PCR           |
| q-ICS1-Rev   | CTTCCAGCTACTATCCCTGTCC                                    | qRT-PCR           |
| q-PR1-Fwd    | AGGCTAACTACAACCTACGCTGCG                                  | qRT-PCR           |
| q-PR1-Rev    | GCTTCTCGTTCACATAATTCCCAC                                  | qRT-PCR           |
| q-PR5-Fwd    | ATCGGGAGATTGCAAATACG                                      | qRT-PCR           |
| q-PR5-Rev    | ATGACCTTAAGCATGTCGGG                                      | qRT-PCR           |

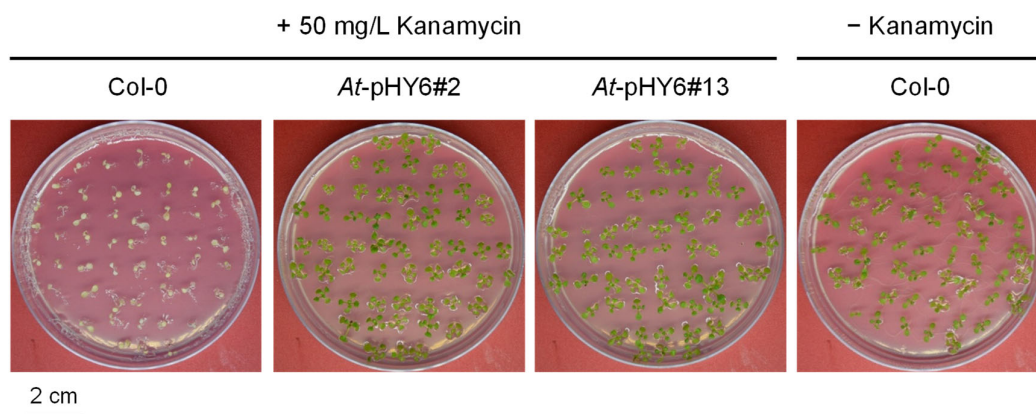

**Figure S1. Seed assays confirming the homozygous status of the *QPR1* RNAi plants.** Seeds of Col-0 and the *QPR1* RNAi plants were germinated on MS medium containing 50 mg·L<sup>-1</sup> kanamycin (Col-0, *At-pHY6#2*, *At-pHY6#13*) or antibiotic-free medium (Col-0).

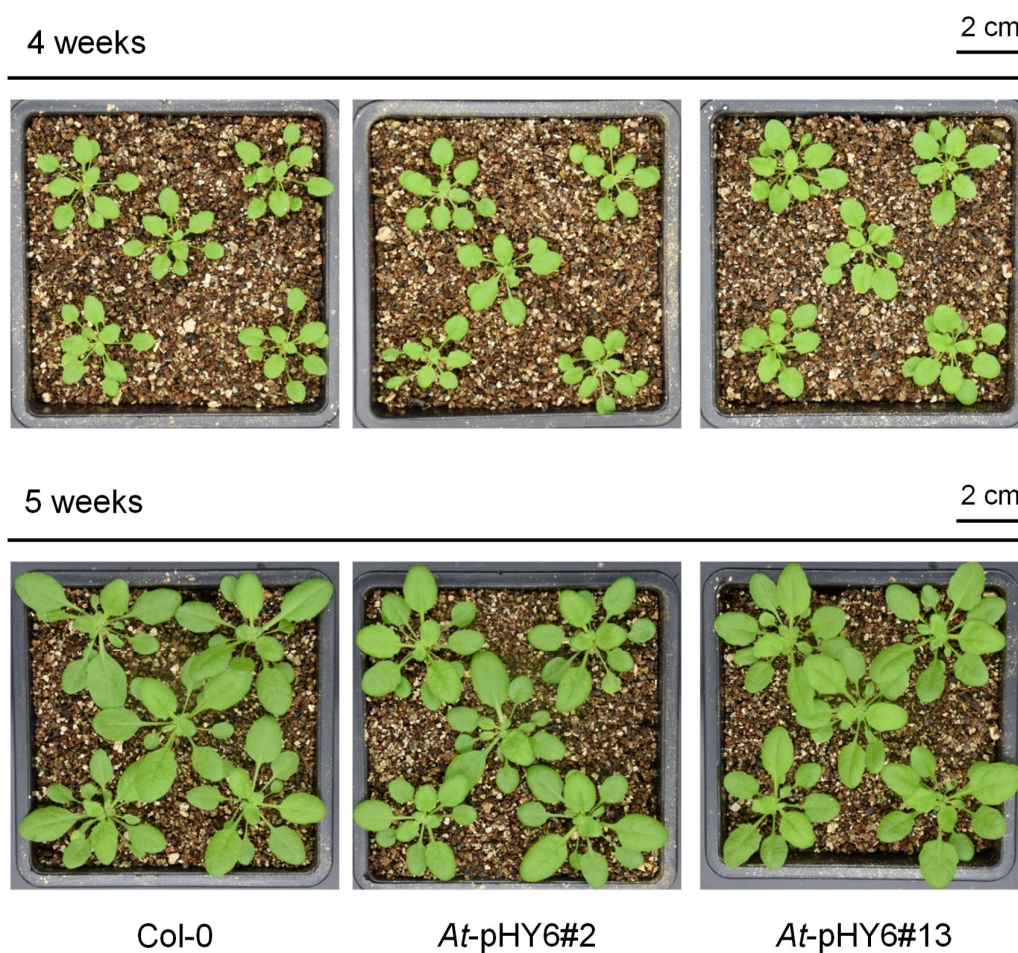

**Figure S2. Knockdown of *QPRT* expression by RNAi did not affect plant growth under optimal growth condition.** Representative photographs of Col-0 and *QPRT* RNAi plants.

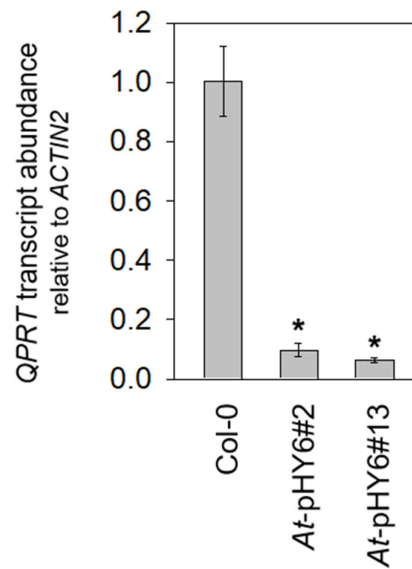

**Figure S3**

**Figure S3. *QPRT* mRNA levels at 48 hpi.** Means  $\pm$  SE of three repetitions are shown. Asterisks indicate that values are significantly different from those of Col-0 at  $*P < 0.05$ .
